# Supplementary material for: A low-carbohydrate ketogenic diet induces the expression of very-low-density lipoprotein receptor in liver and affects its associated metabolic abnormalities
Source: PubMed Central journal article supplement (PMC6889268; doi:10.1038/s41538-019-0058-4), 2019-12-02
Supplement: 41538_2019_58_MOESM1_ESM.pdf [file 41538_2019_58_MOESM1_ESM.pdf]

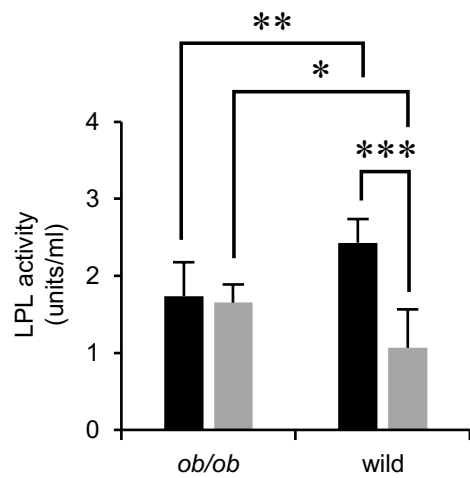

**Fig. S1. Effect of LCKD feeding on serum LPL activity.**

Serum LPL activity (units ml<sup>-1</sup>) as measured using an LPL Activity Assay kit (Cell Biolabs, Inc., San Diego, CA, USA). *ob/ob*, n=6-8; wild-type, n=6-7. In all experiments, statistical significance was assessed using the two-tailed Student's *t* test. \**P*<0.05, \*\**P*<0.01, \*\*\**P*<0.001, chow vs. LCKD. Black squares and bars, regular chow-fed mice; grey squares and bars, LCKD-fed mice. Mean ± S.D.

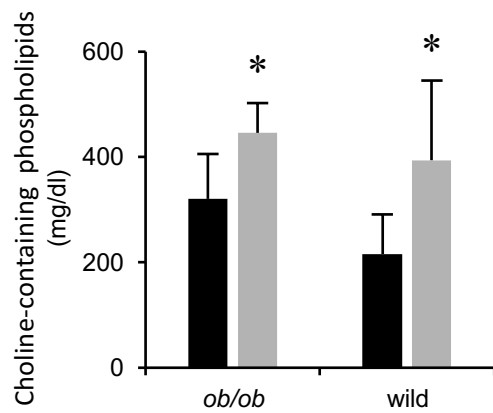

**Fig. S2. Serum content of choline-containing phospholipids.**

Serum content of choline-containing phospholipids (phosphatidylcholines and sphingomyelins:  $\text{mg dl}^{-1}$ ) as measured using a phosphatidylcholine assay kit (FUJIFILM Wako Pure Chemical Corp., Osaka, Japan). *ob/ob*, n=6-8; wild-type, n=6-7. In all experiments, statistical significance was assessed using the two-tailed Student's *t* test. \* $P < 0.05$ , chow vs. LCKD. Black squares and bars, regular chow-fed mice; grey squares and bars, LCKD-fed mice. Mean  $\pm$  S.D.

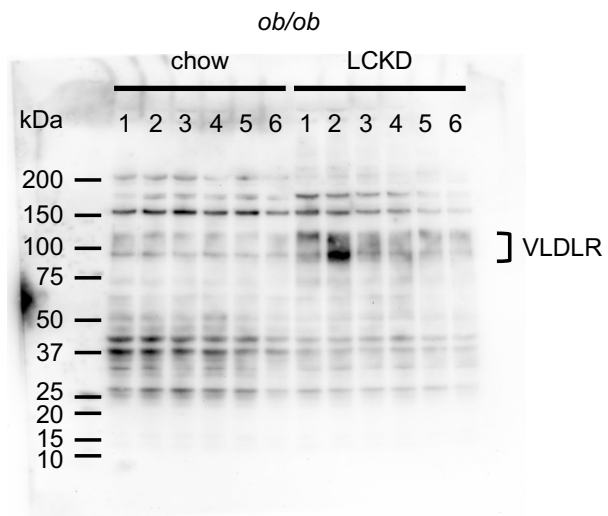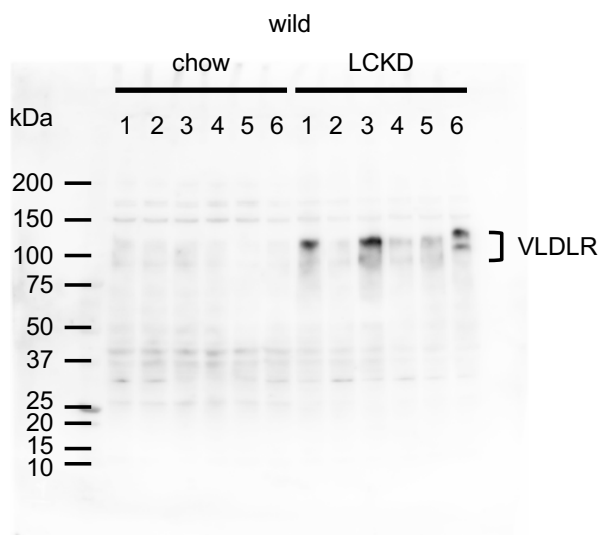

**Fig. S3. Full immunoblot images of Fig. 2A and 2B.**

Full images of immunoblotting of VLDLR in the liver of individual *ob/ob* (upper panel) or wild-type (lower panel) mice.
